# Supplementary material for: Sandwich-like low-sensitive nitroamine explosives stabilized by hydrogen bonds and π–π stacking interactions
Source: Royal Society of Chemistry journal article supplement (doi:10.1039/d0ce01882a), 2021-01-01
Supplement: d0ce01882a1.pdf [file d0ce01882a1.pdf]

## Sandwich-like Low-sensitive Nitroamine Explosives Stabilized by Hydrogen Bonds and $\pi$ - $\pi$ Stacking Interactions

Yanfei Cheng, Xiang Chen, Na Yang, Yazhou Zhang, Haixia Ma, and Zhaoqi Guo\*

School of Chemical Engineering / Xi'an Key Laboratory of Special Energy Materials,  
Northwest University, Xi'an 710069, Shaanxi, P. R. China.

### Table of Contents

1. Crystal data and structure refinement
2. Selected bond lengths, bond angles and hydrogen bonds for **2a** and **4b**
3. Computational details.
4. Detonation Products predicted by EXPLO5
5. References.

### 1. Table S1 Crystal data and structure refinement for **2a** and **4b**

| Identification code                    | <b>2a</b>                                                     | <b>4b</b>                                                       |
|----------------------------------------|---------------------------------------------------------------|-----------------------------------------------------------------|
| Empirical formula                      | C <sub>9</sub> H <sub>13</sub> N <sub>13</sub> O <sub>6</sub> | C <sub>16</sub> H <sub>29</sub> N <sub>30</sub> O <sub>12</sub> |
| Formula weight                         | 399.29                                                        | 825.69                                                          |
| Temperature/K                          | 150.0 (2)                                                     | 150.0 (2)                                                       |
| Crystal system                         | Triclinic                                                     | monoclinic                                                      |
| Space group                            | P-1                                                           | P2 <sub>1</sub> /c                                              |
| a/Å                                    | 8.677(2)                                                      | 21.16(5)                                                        |
| b/Å                                    | 9.036(4)                                                      | 13.182(9)                                                       |
| c/Å                                    | 10.283(4)                                                     | 11.89(2)                                                        |
| $\alpha$ /°                            | 77.57(3)                                                      | 90                                                              |
| $\beta$ /°                             | 78.49(3)                                                      | 105.45(18)                                                      |
| $\gamma$ /°                            | 78.960(19)                                                    | 90                                                              |
| Volume/Å <sup>3</sup>                  | 762.2(5)                                                      | 3196(10)                                                        |
| Z                                      | 2                                                             | 4                                                               |
| $\rho_{\text{calc}}/\text{cm}^3$       | 1.74                                                          | 1.72                                                            |
| $\mu/\text{mm}^{-1}$                   | 0.821                                                         | 0.812                                                           |
| F(000)                                 | 413.3                                                         | 1708                                                            |
| Crystal size/mm <sup>3</sup>           | 0.26 × 0.22 × 0.15                                            | 0.18 × 0.16 × 0.1                                               |
| Radiation                              | GaK $\alpha$ ( $\lambda$ = 1.34138)                           | GaK $\alpha$ ( $\lambda$ = 1.34138)                             |
| 2 $\theta$ range for data collection/° | 7.76 to 109.82                                                | 6.946 to 110.042                                                |
| Index ranges                           | -10 ≤ h ≤ 10, -11 ≤ k ≤ 11, -12 ≤ l ≤ 12                      | -24 ≤ h ≤ 25, -14 ≤ k ≤ 16, -14 ≤ l ≤ 14                        |
| Reflections collected                  | 10801                                                         | 18886                                                           |
| Independent reflections                | 2891                                                          | 5793                                                            |
|                                        | [R <sub>int</sub> = 0.0329, R <sub>sigma</sub> = 0.0280]      | [R <sub>int</sub> = 0.0470, R <sub>sigma</sub> = 0.0491]        |

|                                   |                                                   |                                                   |
|-----------------------------------|---------------------------------------------------|---------------------------------------------------|
| Data/restraints/parameters        | 2891/7/265                                        | 5793/33/559                                       |
| Goodness-of-fit on F <sup>2</sup> | 1.07                                              | 1.043                                             |
| Final R indexes [I>2σ<br>(I)]     | R <sub>1</sub> = 0.0391, wR <sub>2</sub> = 0.0990 | R <sub>1</sub> = 0.0769, wR <sub>2</sub> = 0.2011 |
| Final R indexes [all data]        | R <sub>1</sub> = 0.0448, wR <sub>2</sub> = 0.1044 | R <sub>1</sub> = 0.1039, wR <sub>2</sub> = 0.2248 |
| Largest diff. peak and<br>hole    | 0.50 and -0.31 e.Å <sup>-3</sup>                  | 0.48 and -0.72 e.Å <sup>-3</sup>                  |

## 2. Selected bond lengths, bond angles for 2a.

**Table S2. Bond lengths [Å] for 2a**

| Atom-atom   | Length/Å | Atom-atom   | Length/Å |
|-------------|----------|-------------|----------|
| O(4)-N(1)   | 1.252(2) | N(7)-C(17)  | 1.358(2) |
| O(7)-N(4)   | 1.249(2) | N(10)-N(11) | 1.377(2) |
| O(6)-N(4)   | 1.241(2) | N(10)-N(18) | 1.326(2) |
| O(5)-N(1)   | 1.254(2) | N(11)-C(16) | 1.306(2) |
| N(6)-N(5)   | 1.404(2) | N(2)-N(1)   | 1.332(2) |
| N(6)-C(16)  | 1.390(2) | N(4)-N(5)   | 1.346(2) |
| N(6)-N(18)  | 1.359(2) | N(8)-C(17)  | 1.319(2) |
| N(13)-N(12) | 1.379(2) | N(9)-C(18)  | 1.319(2) |
| N(13)-C(17) | 1.328(2) | C(10)-C(16) | 1.474(2) |
| N(3)-C(10)  | 1.342(2) | C(10)-C(11) | 1.391(2) |
| N(3)-C(14)  | 1.339(2) | C(15)-C(14) | 1.475(2) |
| N(12)-C(15) | 1.300(2) | C(14)-C(13) | 1.393(2) |
| N(7)-N(2)   | 1.411(2) | C(11)-C(12) | 1.387(2) |
| N(7)-C(15)  | 1.388(2) | C(13)-C(12) | 1.386(2) |

**Table S3. Bond angles [°] for 2a.**

| Atom-atom-atom    | Angle/     | Atom-atom-atom    | Angle/     |
|-------------------|------------|-------------------|------------|
| C(16)-N(6)-N(5)   | 130.85(14) | C(11)-C(10)-N(3)  | 123.64(15) |
| C(18)-N(6)-N(5)   | 122.20(14) | C(11)-C(10)-C(16) | 123.17(15) |
| C(18)-N(6)-C(16)  | 106.96(14) | N(7)-C(15)-N(12)  | 110.89(15) |
| C(17)-N(12)-N(12) | 111.97(14) | C(14)-C(15)-N(7)  | 126.28(15) |
| C(14)-N(3)-C(10)  | 117.07(14) | N(11)-C(16)-N(6)  | 110.42(14) |
| C(15)-N(12)-N(13) | 104.58(14) | C(10)-C(16)-N(6)  | 126.62(15) |
| C(15)-N(7)-N(2)   | 128.27(14) | C(10)-C(16)-N(11) | 122.95(15) |
| C(17)-N(7)-N(3)   | 123.40(14) | C(15)-C(14)-N(3)  | 113.56(14) |
| C(17)-N(7)-C(15)  | 106.73(14) | C(13)-C(14)-N(3)  | 123.75(15) |
| C(18)-N(10)-N(11) | 112.14(14) | C(13)-C(14)-C(15) | 122.60(15) |
| C(16)-N(11)-N(10) | 104.73(14) | C(12)-C(11)-C(10) | 118.04(15) |
| N(1)-N(2)-N(7)    | 108.84(13) | C(12)-C(13)-C(14) | 117.94(15) |
| O(5)-N(1)-O(4)    | 120.99(15) | N(10)-C(18)-N(6)  | 105.75(14) |

|                  |            |                   |            |
|------------------|------------|-------------------|------------|
| N(2)-N(1)-O(4)   | 115.66(15) | N(9)-C(18)-N(6)   | 125.93(16) |
| N(2)-N(1)-O(5)   | 123.34(14) | N(9)-C(18)-N(10)  | 128.32(16) |
| O(6)-N(4)-O(7)   | 122.02(16) | C(13)-C(12)-C(11) | 119.52(15) |
| N(5)-N(4)-O(7)   | 123.09(14) | N(7)-C(17)-N(13)  | 105.79(15) |
| N(5)-N(4)-O(6)   | 114.87(15) | N(8)-C(17)-N(13)  | 127.48(16) |
| N(4)-N(5)-N(6)   | 109.31(13) | N(8)-C(17)-N(7)   | 126.69(17) |
| C(16)-C(10)-N(3) | 113.15(14) |                   |            |

**Table S4 Hydrogen bonds present in 2a**

| D-H...A                     | d(D-H) /Å | d(H-A) /Å | d(D-A)/Å | D-H-A /° |
|-----------------------------|-----------|-----------|----------|----------|
| N3-H3...O5                  | 0.88      | 1.87(7)   | 2.69(4)  | 153(6)   |
| N9-H9...O3 <sup>i</sup>     | 0.88      | 2.26(8)   | 2.86(3)  | 124(7)   |
| N9-H9...O1 <sup>ii</sup>    | 0.88      | 2.22(5)   | 2.95(3)  | 139(8)   |
| N4-H4A...N12 <sup>iii</sup> | 0.88      | 2.13(1)   | 3.00     | 169(2)   |
| N4-H4B...O6 <sup>iv</sup>   | 0.88      | 2.00(7)   | 2.83(9)  | 157(3)   |
| N10-H10A...O1 <sup>ii</sup> | 0.88      | 2.34(2)   | 3.06(3)  | 139(2)   |
| N10-H10B...O5 <sup>v</sup>  | 0.88      | 2.12(4)   | 2.93(6)  | 153(1)   |
| C3-H3A...O4 <sup>vi</sup>   | 0.95      | 2.51(3)   | 3.09(4)  | 119(5)   |
| C3-H3A...N12                | 0.95      | 2.46(2)   | 3.09(7)  | 124(1)   |
| C5-H5...O1                  | 0.95      | 2.63(5)   | 3.44(2)  | 142(9)   |
| C5-H5A...N1                 | 0.95      | 2.59(4)   | 3.37(2)  | 139(3)   |
| O5-H5A...O6                 | 0.99(6)   | 1.74(4)   | 2.73(9)  | 177(5)   |
| O5-H5B...O2 <sup>vii</sup>  | 0.71(8)   | 2.57(4)   | 2.90(4)  | 110(4)   |
| O5-H5B...O5 <sup>viii</sup> | 0.71(8)   | 2.33(6)   | 2.85(2)  | 130(1)   |

Symmetry codes: (i)  $-x+2, -y+1, -z$ ; (ii)  $x+1, y, z-1$ ; (iii)  $x, y-1, z+1$ ; (iv)  $x-1, y, z$ ; (v)  $x, y+1, z-1$ ; (vi)  $-x+1, -y+2, -z$ ; (vii)  $x+1, y, z$ ; (viii)  $-x+2, -y, -z+1$ .

**Table S5. Bond lengths [Å] for 4b.**

| Atom-atom   | Length/Å | Atom-atom  | Length/Å |
|-------------|----------|------------|----------|
| O(1)-N(8)   | 1.257(4) | N(11)-C(9) | 1.299(6) |
| O(2)-N(8)   | 1.256(5) | N(9)-N(10) | 1.386(5) |
| O(8)-N(22)  | 1.245(5) | N(9)-C(8)  | 1.309(5) |
| O(6)-N(28)  | 1.256(4) | N(10)-C(9) | 1.350(6) |
| O(3)-N(14)  | 1.242(4) | N(6)-N(7)  | 1.414(6) |
| O(4)-N(14)  | 1.266(5) | N(6)-C(6)  | 1.375(6) |
| O(5)-N(28)  | 1.256(5) | N(6)-C(7)  | 1.370(5) |
| O(7)-N(22)  | 1.243(4) | N(7)-N(8)  | 1.325(4) |
| N(17)-N(18) | 1.385(5) | N(5)-C(7)  | 1.323(6) |
| N(17)-C(14) | 1.313(5) | N(4)-N(3)  | 1.395(5) |
| N(8)-C(15)  | 1.326(6) | N(4)-C(7)  | 1.326(6) |

|             |          |             |          |
|-------------|----------|-------------|----------|
| N(20)-N(21) | 1.391(5) | N(3)-C(6)   | 1.311(5) |
| N(20)-C(15) | 1.363(5) | N(16)-C(11) | 1.335(5) |
| N(13)-N(14) | 1.339(4) | C(13)-C(12) | 1.393(6) |
| N(20)-C(14) | 1.386(6) | N(16)-C(12) | 1.342(5) |
| N(21)-N(22) | 1.341(4) | N(15)-C(13) | 1.340(5) |
| N(9)-C(15)  | 1.334(6) | N(15)-C(10) | 1.339(5) |
| N(26)-N(27) | 1.401(5) | N(2)-C(4)   | 1.343(6) |
| N(26)-C(16) | 1.389(6) | N(2)-C(3)   | 1.329(5) |
| N(26)-C(17) | 1.376(5) | N(1)-C(2)   | 1.339(5) |
| N(27)-N(28) | 1.332(4) | N(1)-C(5)   | 1.331(5) |
| N(25)-C(17) | 1.328(6) | C(11)-C(14) | 1.466(6) |
| N(23)-N(24) | 1.395(5) | C(11)-C(10) | 1.401(6) |
| N(23)-C(16) | 1.298(5) | C(6)-C(2)   | 1.466(6) |
| N(24)-C(17) | 1.321(6) | C(4)-C(8)   | 1.466(5) |
| N(12)-N(13) | 1.400(5) | C(4)-C(5)   | 1.388(6) |
| N(12)-C(9)  | 1.364(5) | C(16)-C(13) | 1.465(5) |
| N(12)-C(8)  | 1.380(6) | C(2)-C(3)   | 1.392(6) |

**Table S6. Bond angles [°] for 4b.**

| Atom-atom-atom    | Angle/   | Atom-atom-atom    | Angle/   |
|-------------------|----------|-------------------|----------|
| C(14)-N(17)-N(17) | 105.3(3) | N(16)-C(11)-C(14) | 119.5(4) |
| C(15)-N(18)-N(17) | 110.9(3) | N(16)-C(11)-C(10) | 121.4(4) |
| C(15)-N(20)-N(21) | 123.9(3) | C(10)-C(11)-C(14) | 119.1(4) |
| C(15)-N(20)-C(14) | 106.5(3) | N(18)-C(15)-N(20) | 106.9(3) |
| C(14)-N(20)-N(21) | 129.2(3) | N(18)-C(15)-N(19) | 128.1(4) |
| N(22)-N(21)-N(20) | 109.3(3) | N(19)-C(15)-N(20) | 125.0(4) |
| O(8)-N(22)-N(21)  | 114.8(3) | N(6)-C(6)-C(2)    | 127.5(3) |
| O(7)-N(22)-O(8)   | 122.0(3) | N(3)-C(6)-N(6)    | 109.8(3) |
| O(7)-N(22)-N(21)  | 123.2(3) | N(3)-C(6)-C(2)    | 122.7(4) |
| C(16)-N(26)-N(27) | 131.0(3) | N(5)-C(7)-N(6)    | 122.5(4) |
| C(17)-N(26)-N(27) | 122.6(3) | N(5)-C(7)-N(4)    | 128.5(3) |
| C(17)-N(26)-C(16) | 106.0(3) | N(4)-C(7)-N(6)    | 108.9(4) |
| N(28)-N(27)-N(26) | 108.7(3) | N(2)-C(4)-C(8)    | 119.0(4) |
| O(6)-N(28)-N(27)  | 123.6(3) | N(2)-C(4)-C(5)    | 121.5(4) |
| O(5)-N(28)-O(6)   | 121.0(3) | C(5)-C(4)-C(8)    | 119.5(4) |
| O(5)-N(28)-N(27)  | 115.3(3) | N(17)-C(14)-N(20) | 110.4(3) |
| C(16)-N(23)-N(24) | 106.6(3) | N(17)-C(14)-C(11) | 121.7(4) |
| C(17)-N(24)-N(23) | 109.5(3) | N(20)-C(14)-C(11) | 127.9(4) |
| C(9)-N(12)-N(13)  | 122.5(3) | N(11)-C(9)-N(12)  | 125.2(4) |
| C(9)-N(12)-C(8)   | 107.0(3) | N(11)-C(9)-N(10)  | 128.4(3) |
| C(8)-N(12)-N(13)  | 130.1(3) | N(10)-C(9)-N(12)  | 106.4(4) |
| N(14)-N(13)-N(12) | 108.3(3) | N(26)-C(16)-C(13) | 127.3(4) |
| O(3)-N(14)-O(4)   | 121.7(3) | N(23)-C(16)-N(26) | 110.2(3) |

|                   |          |                   |          |
|-------------------|----------|-------------------|----------|
| O(3)-N(14)-N(13)  | 124.3(3) | N(23)-C(16)-C(13) | 122.5(4) |
| O(4)-N(14)-N(13)  | 114.0(3) | N(12)-C(8)-C(4)   | 127.5(3) |
| C(8)-N(9)-N(10)   | 105.7(3) | N(9)-C(8)-N(12)   | 110.7(3) |
| C(9)-N(10)-N(9)   | 110.2(3) | N(9)-C(8)-C(4)    | 121.8(4) |
| C(6)-N(6)-N(7)    | 131.3(3) | N(25)-C(17)-N(26) | 123.7(4) |
| C(7)-N(6)-N(7)    | 122.5(3) | N(24)-C(17)-N(26) | 107.6(3) |
| C(7)-N(6)-C(6)    | 106.0(3) | N(24)-C(17)-N(25) | 128.6(3) |
| N(8)-N(7)-N(6)    | 108.9(3) | N(1)-C(2)-C(6)    | 118.9(4) |
| O(1)-N(8)-N(7)    | 123.6(3) | N(1)-C(2)-C(3)    | 122.3(4) |
| O(2)-N(8)-O(1)    | 121.0(3) | C(3)-C(2)-C(6)    | 118.9(3) |
| O(2)-N(8)-N(7)    | 115.4(3) | N(15)-C(13)-C(16) | 119.5(4) |
| C(7)-N(4)-N(3)    | 107.8(3) | N(15)-C(13)-C(12) | 121.6(4) |
| C(6)-N(3)-N(4)    | 107.4(3) | C(12)-C(13)-C(16) | 118.9(4) |
| C(11)-N(16)-C(12) | 116.4(4) | N(15)-C(10)-C(11) | 122.2(4) |
| C(10)-N(15)-C(13) | 116.2(4) | N(16)-C(10)-C(11) | 122.2(4) |
| C(3)-N(2)-C(4)    | 116.4(4) | N(2)-C(3)-C(2)    | 121.6(4) |
| C(5)-N(1)-C(2)    | 115.7(4) | N(1)-C(5)-C(4)    | 122.5(4) |

**Table S7 Hydrogen bonds present in 4b**

| D-H...A                        | d(D-H) /Å | d(H-A) /Å | d(D-A)/Å | D-H-A /° |
|--------------------------------|-----------|-----------|----------|----------|
| N18-H18...N23 <sup>i</sup>     | 0.88      | 2.65(6)   | 3.51(4)  | 165(2)   |
| N18-H18...N24 <sup>i</sup>     | 0.88      | 1.83(8)   | 2.69(4)  | 163(8)   |
| N19-H19A...O7 <sup>ii</sup>    | 0.88      | 2.40(4)   | 3.20(1)  | 150(7)   |
| N19-H19A...O9 <sup>iii</sup>   | 0.88      | 2.08(3)   | 2.74(2)  | 131(0)   |
| N19-H19B...O4 <sup>iv</sup>    | 0.88      | 2.13(3)   | 2.90(7)  | 146(5)   |
| N25-H25A...O6 <sup>v</sup>     | 0.88      | 2.25      | 3.02     | 145(9)   |
| N25-H25B...O2 <sup>vi</sup>    | 0.88      | 2.13(5)   | 2.90(6)  | 145(9)   |
| N11-H11A...O3 <sup>vii</sup>   | 0.88      | 2.35(6)   | 3.17(9)  | 155(8)   |
| N11-H11A...O12 <sup>viii</sup> | 0.88      | 2.22(8)   | 2.85     | 127(4)   |
| N11-H11B...O8 <sup>ix</sup>    | 0.88      | 2.28(6)   | 3.01(5)  | 140(1)   |
| N5-H5A...O1 <sup>x</sup>       | 0.88      | 2.20(2)   | 2.98(4)  | 147(7)   |
| N5-H5B...O5 <sup>xi</sup>      | 0.88      | 2.39(2)   | 3.08(5)  | 135(8)   |
| N4-H4...N9 <sup>i</sup>        | 0.88      | 2.67(1)   | 3.54     | 169(6)   |
| N4-H4...N10 <sup>i</sup>       | 0.88      | 1.96(9)   | 2.80(4)  | 157(9)   |
| N30-H30A...N7 <sup>vi</sup>    | 0.96(8)   | 1.96(9)   | 2.89(2)  | 158(6)   |
| N30-H30B...N13                 | 0.96      | 2.53(2)   | 3.04(1)  | 113(2)   |
| N30-H30B...N2                  | 0.96      | 2.34(4)   | 3.12(9)  | 138(4)   |
| N30-H30C...N21 <sup>iv</sup>   | 0.96(8)   | 2.07      | 3.00(8)  | 162(6)   |

|                              |         |         |         |        |
|------------------------------|---------|---------|---------|--------|
| N30–H30D···O11               | 0.99(4) | 1.74(5) | 2.73(9) | 178(9) |
| C10–H10···O6 <sup>ii</sup>   | 0.95    | 2.57(3) | 3.49(6) | 164    |
| C10–H10···O9                 | 0.95    | 2.55(6) | 3.16(9) | 122(5) |
| C12–H12···O7 <sup>v</sup>    | 0.95    | 2.49(5) | 3.39(2) | 157(6) |
| C3–H3···O3 <sup>x</sup>      | 0.95    | 2.53    | 3.43(6) | 159(6) |
| C5–H5···O1 <sup>vii</sup>    | 0.95    | 2.63(8) | 3.55(9) | 163(5) |
| N29–H29A···O10               | 0.95(1) | 2.22(8) | 2.78    | 116(1) |
| N29–H29B···N21 <sup>iv</sup> | 0.963   | 2.61(6) | 3.31(2) | 129(4) |
| N29–H29B···N16 <sup>iv</sup> | 0.963   | 2.1(8)  | 3.07(2) | 153(4) |
| N29–H29C···O11               | 0.959   | 1.87(6) | 2.80(3) | 161(5) |
| N29–H29D···O4 <sup>x</sup>   | 0.96(1) | 1.98(8) | 2.94    | 170(2) |
| N29–H29D···N14 <sup>x</sup>  | 0.96(1) | 2.65(2) | 3.50(5) | 148(1) |

Symmetry codes: (i) x, y, z-1; (ii) x, -y+1/2, z-1/2; (iii) -x+1, -y+1, -z; (iv) -x+1, -y+1, -z+1; (v) x, -y+1/2, z+1/2; (vi) -x+2, -y+1, -z+2; (vii) x, -y+3/2, z+1/2; (viii) x, y, z+1; (xi) -x+1, y+1/2, -z+3/2; (x) x, -y+3/2, z-1/2; (xi) -x+2, y+1/2, -z+3/2;

### 3. Computational details.

All calculations were carried out using the Gaussian G16 (revision C.01) program package. The enthalpies (H) were calculated using the modified CBS-4M method. The enthalpies of the gasphase species M were computed according to the atomization energy method [Equation (1)]. The results obtained from theoretical calculations at the CBS-4M level of theory were given in Table 3. The calculated enthalpy of cations and the enthalpy of formation of the atom were obtained from reference 1 and NIST WebBook. Meanwhile, the solid-phase heat of formation is calculated on the basis of Born-Haber energy cycle [Equation (1)]<sup>2</sup>.

$$\Delta_f H^\circ_{(g,M,298)} = H_{(molecule,298)} - \sum H^\circ_{(Atoms,298)} + \sum \Delta_f H^\circ_{(Atoms,298)} \quad (1)$$

$$\Delta H_{sub} = 188 \times T_m \quad (2)$$

T<sub>m</sub> represents the melting point or decomposition temperature of a substance

**Table S8. Results obtained from theoretical calculations at the CBS-4M level of theory.**

|                                 | -H / a.u.   |
|---------------------------------|-------------|
| 2a                              | 1358.928877 |
| 2a <sup>-</sup>                 | 1357.883768 |
| 2b                              | 1374.955214 |
| 2b <sup>-</sup>                 | 1373.916249 |
| NH <sub>4</sub> <sup>+</sup>    | 56.796608   |
| NH <sub>3</sub> OH <sup>+</sup> | 131.211668  |
| AG <sup>+</sup>                 | 260.701802  |

**Table 7. Literature values for atomic  $\Delta H_f^{298}$  /kcal·mol<sup>-1</sup>.**

|   | -H / a.u. | NIST/ kcal·mol <sup>-1</sup> |
|---|-----------|------------------------------|
| C | 37.786156 | 171.3                        |
| H | 0.500991  | 52.1                         |
| N | 54.522462 | 113                          |
| O | 74.991202 | 59.6                         |

#### 4. Detonation Products predicted by EXPLO5

| <b>2a</b>                      |              |              |         | <b>2b</b>                      |              |              |         |
|--------------------------------|--------------|--------------|---------|--------------------------------|--------------|--------------|---------|
| Detonation Products            | mol/mol      | mol/kg       | Mol %   | Detonation Products            | mol/mol      | mol/kg       | Mol %   |
| C(d)                           | 8.166756E00  | 2.248172E01  | 46.2680 | C(d)                           | 7.071049E00  | 1.941252E01  | 39.1213 |
| N <sub>2</sub>                 | 6.229522E00  | 1.714884E01  | 33.0044 | N <sub>2</sub>                 | 6.792320E00  | 1.864731E01  | 37.5792 |
| H <sub>2</sub> O               | 2.976388E00  | 8.193501E00  | 15.7691 | H <sub>2</sub> O               | 2.756539E00  | 7.567669E00  | 15.2508 |
| NH <sub>3</sub>                | 5.210898E-01 | 1.434474E00  | 2.7608  | NH <sub>3</sub>                | 3.958402E-01 | 1.086721E00  | 2.1900  |
| CO                             | 2.741711E-01 | 7.547477E-1  | 1.4526  | CO                             | 3.446338E-01 | 9.461410E-01 | 1.9067  |
| CH <sub>2</sub> O <sub>2</sub> | 2.607833E-01 | 7.178930E-01 | 1.3816  | CH <sub>2</sub> O <sub>2</sub> | 2.833581E-01 | 7.779178E-01 | 0.9176  |
| H <sub>2</sub>                 | 1.771826E-01 | 4.877544E-01 | 0.9387  | CO <sub>2</sub>                | 1.658511E-01 | 4.553196E-01 | 0.8240  |
| CO <sub>2</sub>                | 1.136998E-01 | 3.129966E-01 | 0.6024  | H <sub>2</sub>                 | 1.489337E-01 | 4.088754E-01 | 0.4266  |
| CH <sub>4</sub>                | 1.052564E-01 | 2.897534E-01 | 0.5577  | CH <sub>4</sub>                | 7.710529E-02 | 2.116812E-01 | 0.1048  |
| C <sub>2</sub> H <sub>6</sub>  | 2.231724E-02 | 6.143565E-02 | 0.1182  | HCN                            | 1.893501E-02 | 5.198327E-02 | 0.0756  |
| HCN                            | 1.900873E-02 | 5.232789E-02 | 0.1007  | C <sub>2</sub> H <sub>6</sub>  | 1.365628E-02 | 3.749130E-02 | 0.0314  |
| C <sub>2</sub> H <sub>4</sub>  | 7.607564E-03 | 2.094236E-02 | 0.0403  | C <sub>2</sub> H <sub>4</sub>  | 5.672969E-03 | 1.557430E-02 | 0.0022  |
| CH <sub>3</sub> OH             | 4.658569E-04 | 1.282427E-03 | 0.0025  | CH <sub>3</sub> OH             | 3.977811E-04 | 1.092049E-03 | 0.0014  |
| N <sub>2</sub> H <sub>4</sub>  | 3.738742E-04 | 1.029214E-03 | 0.0020  | N <sub>2</sub> H <sub>4</sub>  | 2.464372E-04 | 6.765569E-04 | 0.0005  |
| NH <sub>2</sub>                | 1.066458E-04 | 2.935783E-04 | 0.0006  | NH <sub>2</sub>                | 8.873934E-05 | 2.436207E-04 | 0.0003  |
| H                              | 6.899877E-05 | 1.899422E-04 | 0.0004  | H                              | 6.104165E-05 | 1.675808E-04 | 0.0000  |
| CH <sub>2</sub> O              | 6.406353E-06 | 1.763563E-05 | 0.0000  | CH <sub>2</sub> O              | 7.420622E-06 | 2.037222E-05 | 0.0000  |
| CHNO                           | 1.545425E-06 | 4.254298E-06 | 0.0000  | CHNO                           | 2.126826E-06 | 5.838887E-06 | 0.0000  |
| CNO                            | 1.345320E-06 | 3.703443E-06 | 0.0000  | CNO                            | 1.608100E-06 | 4.414801E-06 | 0.0000  |
| N                              | 2.213128E-07 | 6.092375E-07 | 0.0000  | N                              | 1.944616E-07 | 5.338656E-07 | 0.0000  |
| N <sub>2</sub> O               | 1.954458E-08 | 5.380299E-08 | 0.0000  | N <sub>2</sub> O               | 2.454710E-08 | 6.739004E-08 | 0.0000  |
| NO <sub>2</sub>                | 6.125567E-09 | 1.686267E-08 | 0.0000  | NO <sub>2</sub>                | 7.334994E-09 | 2.013714E-08 | 0.0000  |
| C(gr)                          | 5.075377E-10 | 1.397167E-09 | 0.0000  | C(gr)                          | 5.728141E-10 | 1.572576E-09 | 0.0000  |

  

| <b>3a</b>                      |              |              |         | <b>3b</b>                      |              |              |         |
|--------------------------------|--------------|--------------|---------|--------------------------------|--------------|--------------|---------|
| Detonation Products            | mol/mol      | mol/kg       | Mol %   | Detonation Products            | mol/mol      | mol/kg       | Mol %   |
| C(d)                           | 8.151796E00  | 1.889877E01  | 36.0811 | C(d)                           | 7.367112E00  | 1.704048E01  | 33.7499 |
| N <sub>2</sub>                 | 6.793532E00  | 1.574983E01  | 30.0692 | N <sub>2</sub>                 | 7.103334E00  | 1.643035E01  | 32.5415 |
| H <sub>2</sub> O               | 5.189306E00  | 1.203066E01  | 22.9687 | H <sub>2</sub> O               | 5.004043E00  | 1.157459E01  | 22.9243 |
| NH <sub>3</sub>                | 1.391270E00  | 3.228010E00  | 6.1628  | NH <sub>3</sub>                | 1.238155E00  | 2.863912E00  | 5.6722  |
| CH <sub>2</sub> O <sub>2</sub> | 2.921644E-01 | 6.773413E-01 | 1.2932  | CH <sub>2</sub> O <sub>2</sub> | 3.500020E01  | 8.095714E-01 | 1.6034  |
| H <sub>2</sub>                 | 2.908092E-01 | 6.741995E-01 | 0.9144  | H <sub>2</sub>                 | 2.769351E-01 | 6.405651E-01 | 1.2687  |

|                               |              |              |        |                               |              |              |        |
|-------------------------------|--------------|--------------|--------|-------------------------------|--------------|--------------|--------|
| CH <sub>4</sub>               | 2.065993E-01 | 4.789708E-01 | 0.6107 | CO                            | 1.828211E-01 | 4.228739E-01 | 0.8375 |
| CO                            | 1.379805E-01 | 3.198880E-01 | 0.2788 | CH <sub>4</sub>               | 1.634098E-01 | 3.779747E-01 | 0.7486 |
| C <sub>2</sub> H <sub>6</sub> | 6.299876E-02 | 1.460536E-01 | 0.1944 | CO <sub>2</sub>               | 5.627539E-02 | 1.301677E-01 | 0.2578 |
| CO <sub>2</sub>               | 4.392691E-02 | 1.018382E-01 | 0.0758 | C <sub>2</sub> H <sub>6</sub> | 4.774081E-02 | 1.104268E-01 | 0.2187 |
| HCN                           | 1.713435E-02 | 3.972354E-02 | 0.0528 | HCN                           | 2.346110E-02 | 5.426665E-02 | 0.1075 |
| C <sub>2</sub> H <sub>4</sub> | 1.193483E-02 | 2.766920E-02 | 0.0072 | C <sub>2</sub> H <sub>4</sub> | 1.231668E-02 | 2.848907E-02 | 0.0564 |
| N <sub>2</sub> H <sub>4</sub> | 1.627335E-03 | 3.772473E-03 | 0.0023 | N <sub>2</sub> H <sub>4</sub> | 1.950773E-03 | 4.512232E-03 | 0.0089 |
| CH <sub>3</sub> OH            | 5.280011E-04 | 1.224095E-03 | 0.0008 | CH <sub>3</sub> OH            | 5.755738E-04 | 1.331330E-03 | 0.0026 |
| NH <sub>2</sub>               | 1.745855E-04 | 4.047514E-04 | 0.0004 | NH <sub>2</sub>               | 2.542645E-04 | 5.881260E-04 | 0.0012 |
| H                             | 9.314290E-05 | 2.159385E-04 | 0.0000 | H                             | 1.415727E-04 | 3.274644E-04 | 0.0006 |
| CH <sub>2</sub> O             | 1.956109E-06 | 4.534959E-06 | 0.0000 | CH <sub>2</sub> O             | 2.908948E-06 | 6.728535E-06 | 0.0000 |
| CHNO                          | 7.796956E-07 | 1.807613E-06 | 0.0000 | CNO                           | 1.887113E-06 | 4.364983E-06 | 0.0000 |
| CNO                           | 4.576433E-07 | 1.060980E-06 | 0.0000 | N                             | 1.112726E-06 | 2.573788E-06 | 0.0000 |
| N                             | 2.692463E-07 | 6.242091E-07 | 0.0000 | CHNO                          | 4.723254E-07 | 1.092511E-06 | 0.0000 |
| N <sub>2</sub> O              | 9.583186E-09 | 2.221724E-08 | 0.0000 | N <sub>2</sub> O              | 2.264355E-08 | 5.237560E-08 | 0.0000 |
| NO <sub>2</sub>               | 5.813614E-09 | 1.347803E-08 | 0.0000 | NO <sub>2</sub>               | 1.664178E-08 | 3.849324E-08 | 0.0000 |
| C(gr)                         | 2.593515E-10 | 6.012693E-10 | 0.0000 | C(gr)                         | 2.701193E-10 | 6.247989E-10 | 0.0000 |

**4a**

**4b**

| Detonation                     |              |              |         | Detonation                     |              |              |         |
|--------------------------------|--------------|--------------|---------|--------------------------------|--------------|--------------|---------|
| Products                       | mol/mol      | mol/kg       | Mol %   | Products                       | mol/mol      | mol/kg       | Mol %   |
| C(d)                           | 8.098136E00  | 2.027870E01  | 37.9683 | C(d)                           | 7.220937E00  | 1.803737E01  | 34.7815 |
| N <sub>2</sub>                 | 6.477502E00  | 1.622044E01  | 30.3699 | N <sub>2</sub>                 | 7.052676E00  | 1.761707E01  | 33.9710 |
| H <sub>2</sub> O               | 3.769883E00  | 9.440236E00  | 17.6752 | H <sub>2</sub> O               | 3.735013E00  | 9.329790E00  | 17.9907 |
| NH <sub>3</sub>                | 2.040287E00  | 5.109121E00  | 9.5659  | NH <sub>3</sub>                | 1.888233E00  | 43746667E00  | 5.0952  |
| CH <sub>4</sub>                | 4.233688E-01 | 1.060166E00  | 1.9850  | CH <sub>4</sub>                | 3.517244E-01 | 8.785818E-01 | 1.6942  |
| H <sub>2</sub>                 | 2.139862E-01 | 5.358471E-01 | 1.0033  | H <sub>2</sub>                 | 2.205531E-01 | 5.509256E-01 | 1.0624  |
| C <sub>2</sub> H <sub>6</sub>  | 1.669886E-01 | 4.181592E-01 | 0.7829  | C <sub>2</sub> H <sub>6</sub>  | 1.292613E-01 | 3.228853E-01 | 0.6226  |
| CH <sub>2</sub> O <sub>2</sub> | 9.113134E-02 | 2.282037E-01 | 0.4273  | CH <sub>2</sub> O <sub>2</sub> | 1.018808E-01 | 2.544907E-01 | 0.4907  |
| CO                             | 2.531349E-02 | 6.338800E-02 | 0.1187  | CO                             | 3.405826E-02 | 8.507504E-02 | 0.1641  |
| CO <sub>2</sub>                | 1.115938E-02 | 2.794443E-02 | 0.0523  | CO <sub>2</sub>                | 1.346249E-02 | 3.362832E-02 | 0.0648  |
| C <sub>2</sub> H <sub>4</sub>  | 6.686028E-03 | 1.674261E-02 | 0.0313  | C <sub>2</sub> H <sub>4</sub>  | 7.218053E-03 | 1.803016E-02 | 0.0348  |
| HCN                            | 3.320007E-03 | 8.313692E-03 | 0.0156  | HCN                            | 4.736482E-03 | 1.183139E-02 | 0.0228  |
| N <sub>2</sub> H <sub>4</sub>  | 6.839922E-04 | 1.712798E-03 | 0.0032  | N <sub>2</sub> H <sub>4</sub>  | 8.241594E-04 | 2.028690E-03 | 0.0040  |
| CH <sub>3</sub> OH             | 2.218795E-04 | 5.556127E-04 | 0.0010  | CH <sub>3</sub> OH             | 2.413067E-04 | 6.027665E-04 | 0.0012  |
| NH <sub>2</sub>                | 1.932234E-05 | 4.838543E-05 | 0.0001  | NH <sub>2</sub>                | 3.007431E-05 | 7.512343E-05 | 0.0001  |
| H                              | 5.856217E-06 | 1.466467E-05 | 0.0000  | H                              | 9.861358E-06 | 2.463295E-05 | 0.0000  |
| CH <sub>2</sub> O              | 1.777633E-07 | 4.451404E-07 | 0.0000  | CH <sub>2</sub> O              | 2.719067E-07 | 6.792030E-07 | 0.0000  |
| CHNO                           | 1.649310E-08 | 4.130070E-08 | 0.0000  | CHNO                           | 2.889936E-08 | 7.218849E-08 | 0.0000  |
| CNO                            | 8.222593E-09 | 2.059035E-08 | 0.0000  | CNO                            | 2.007627E-08 | 5.014905E-08 | 0.0000  |
| N                              | 3.488577E-09 | 8.735813E-09 | 0.0000  | N                              | 9.259689E-09 | 2.313002E-08 | 0.0000  |
| C(gr)                          | 1.990688E-10 | 4.984920E-10 | 0.0000  | N <sub>2</sub> O               | 3.636584E-10 | 9.083920E-10 | 0.0000  |
| N <sub>2</sub> O               | 1.561364E-10 | 3.909841E-10 | 0.0000  | C(gr)                          | 2.091857E-10 | 5.225305E-10 | 0.0000  |



| 5a                             |              |              |         | 5b                             |              |              |         |
|--------------------------------|--------------|--------------|---------|--------------------------------|--------------|--------------|---------|
| Detonation Products            | mol/mol      | mol/kg       | Mol %   | Detonation Products            | mol/mol      | mol/kg       | Mol %   |
| C(d)                           | 9.438500E00  | 1.845469E01  | 35.6171 | N <sub>2</sub>                 | 9.674752E00  | 1.888007E01  | 37.0438 |
| N <sub>2</sub>                 | 9.218725E00  | 1.802497E01  | 34.7877 | C(d)                           | 8.798533E00  | 1.717015E01  | 33.6889 |
| H <sub>2</sub> O               | 3.784262E00  | 7.399202E00  | 14.2803 | H <sub>2</sub> O               | 3.792490E00  | 7.400962E00  | 14.5211 |
| NH <sub>3</sub>                | 2.557664E00  | 5.000889E00  | 9.6516  | NH <sub>3</sub>                | 2.645062E00  | 5.161781E00  | 10.1277 |
| CH <sub>4</sub>                | 7.713203E-01 | 1.508129E00  | 2.9107  | CH <sub>4</sub>                | 5.880342E-01 | 1.147536E00  | 2.2515  |
| C <sub>2</sub> H <sub>6</sub>  | 3.215654E-01 | 6.287426E-01 | 1.2135  | H <sub>2</sub>                 | 2.501983E-01 | 4.882566E-01 | 0.9580  |
| H <sub>2</sub>                 | 2.702594E-01 | 5.284264E-01 | 1.019   | C <sub>2</sub> H <sub>6</sub>  | 2.350094E-01 | 4.644701E-01 | 0.9113  |
| CH <sub>2</sub> O <sub>2</sub> | 7.819018E-02 | 1.528818E-01 | 0.2951  | CH <sub>2</sub> O <sub>2</sub> | 7.922424E-02 | 1.546044E-01 | 0.3033  |
| CO                             | 3.056332E-02 | 5.975911E-02 | 0.1153  | CO                             | 2.632931E-02 | 5.138108E-02 | 0.1008  |
| CO <sub>2</sub>                | 1.424277E-02 | 2.784826E-02 | 0.0537  | CO <sub>2</sub>                | 1.124582E-02 | 2.194597E-02 | 0.0431  |
| C <sub>2</sub> H <sub>4</sub>  | 9.940859E-03 | 1.943692E-02 | 0.0375  | C <sub>2</sub> H <sub>4</sub>  | 8.222366E-03 | 1.604577E-02 | 0.0315  |
| HCN                            | 3.862434E-03 | 7.552048E-03 | 0.0146  | HCN                            | 3.928827E-03 | 7.667020E-03 | 0.0150  |
| N <sub>2</sub> H <sub>4</sub>  | 5.043249E-04 | 9.860842E-04 | 0.0019  | N <sub>2</sub> H <sub>4</sub>  | 7.435408E-04 | 1.451004E-03 | 0.0028  |
| CH <sub>3</sub> OH             | 3.079444E-04 | 6.021102E-04 | 0.0012  | CH <sub>3</sub> OH             | 2.406324E-04 | 4.695890E-04 | 0.0009  |
| NH <sub>2</sub>                | 1.479471E-05 | 2.892745E-05 | 0.0001  | NH <sub>2</sub>                | 1.896272E-05 | 3.641989E-05 | 0.0001  |
| H                              | 3.953223E-06 | 7.729564E-06 | 0.0000  | H                              | 4.906934E-06 | 9.575777E-06 | 0.0000  |
| CH <sub>2</sub> O              | 3.000284E-07 | 5.866323E-07 | 0.0000  | CH <sub>2</sub> O              | 1.939807E-07 | 3.785494E-07 | 0.0000  |
| CHNO                           | 3.212872E-08 | 6.281987E-08 | 0.0000  | CHNO                           | 2.032405E-08 | 3.944195E-08 | 0.0000  |
| CNO                            | 4.291003E-09 | 8.390010E-09 | 0.0000  | CNO                            | 5.981160E-09 | 1.167210E-08 | 0.0000  |
| N                              | 9.306557E-10 | 1.819670E-09 | 0.0000  | N                              | 2.932220E-09 | 4.084873E-09 | 0.0000  |
| C(gr)                          | 2.506000E-10 | 4.899872E-10 | 0.0000  | C(gr)                          | 2.082187E-10 | 4.063342E-10 | 0.0000  |
| N <sub>2</sub> O               | 1.021229E-10 | 1.996764E-10 | 0.0000  | N <sub>2</sub> O               | 1.338515E-10 | 2.612084E-10 | 0.0000  |
| NO <sub>2</sub>                | 5.711419E-12 | 1.116729E-11 | 0.0000  | NO <sub>2</sub>                | 1.147823E-11 | 2.239952E-11 | 0.0000  |

## 5. References.

1. Dippold, A. A.; Klapotke, T. M. Synthesis and Characterization of Bis(triaminoguanidinium) 5,5'-Dinitrimino-3,3'-azo-1H-1,2,4-triazolate – A Novel Insensitive Energetic Material. *Z. Anorg. Allg. Chem.* 2011, 637, 1181–1193
2. X Chen, Z Q Cuo, C Zhang. Constructing a 3D-layered energetic metal– organic framework with the strong stacking interactions of hydrogen-bridged rings: the way to an insensitive high energy complex. *CrystEngComm*, 2020, 22, 5436–5446
